# Supplementary material for: A Comparative Study of Window Size and Channel Arrangement on EEG-Emotion Recognition Using Deep CNN
Source: PubMed Central journal article supplement (PMC7957771; doi:10.3390/s21051678), 2021-03-01
Supplement: sensors-21-01678-s001.pdf [file sensors-21-01678-s001.pdf]

Table A1: averaged subject-independent emotion classification accuracies across subjects

| Classification | Method         | Window size (s) |              |              |              |              |              |              |              |              |
|----------------|----------------|-----------------|--------------|--------------|--------------|--------------|--------------|--------------|--------------|--------------|
|                |                | 2               | 3            | 4            | 5            | 6            | 7            | 8            | 9            | 10           |
| Arousal        | SVM-Linear     | 47.04           | 46.80        | 46.73        | 46.90        | 46.14        | 46.93        | 46.96        | 47.40        | 48.25        |
|                | SVM-Polynomial | 48.23           | 49.02        | 48.79        | 48.35        | 49.50        | 48.91        | 48.39        | 49.37        | 49.88        |
|                | SVM-RBF*       | 44.09           | 44.05        | 43.70        | 43.96        | 45.17        | 44.68        | 44.64        | 44.72        | 44.88        |
|                | This study     | <b>53.15</b>    | <b>54.86</b> | <b>56.30</b> | <b>55.80</b> | <b>56.41</b> | <b>56.55</b> | <b>56.19</b> | <b>56.64</b> | <b>56.85</b> |
| Valence        | SVM-Linear     | 51.69           | 50.53        | 51.52        | 50.23        | 50.12        | 50.80        | 50.06        | 50.24        | 49.20        |
|                | SVM-Polynomial | 51.18           | 50.73        | 51.33        | 51.23        | 49.62        | 50.72        | 50.39        | 49.75        | 49.24        |
|                | SVM-RBF*       | 52.95           | 53.89        | 54.87        | 54.84        | 53.66        | 54.90        | 55.47        | 54.88        | 54.46        |
|                | This study     | <b>69.82</b>    | <b>71.43</b> | <b>72.29</b> | <b>73.04</b> | <b>73.04</b> | <b>72.37</b> | <b>73.34</b> | <b>72.73</b> | <b>72.88</b> |

\* The results of SVM with RBF kernel are also presented in <https://arxiv.org/abs/1611.10120>

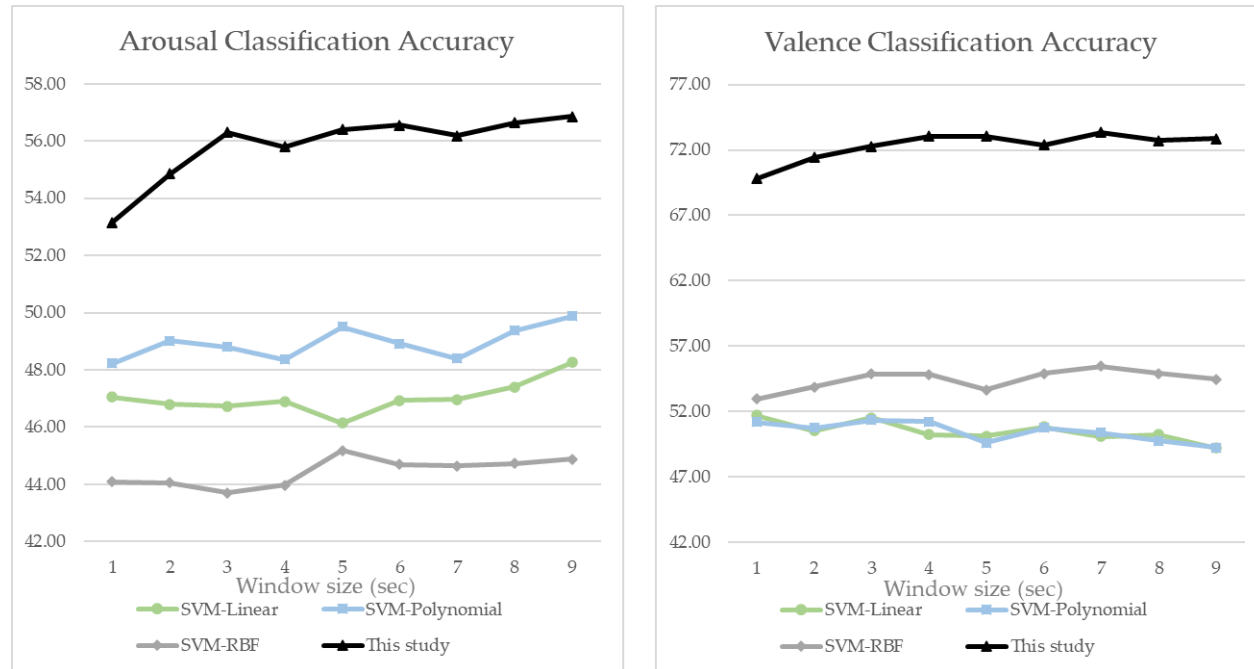

Figure A1: averaged subject-independent emotion classification accuracies across subjects
